# Supplementary material for: Recent Invaders in Small Mediterranean Islands: Wild Boars Impact Snakes in Port-Cros National Park
Source: MDPI journal article supplement (doi:10.3390/d13100498), 2021-10-15
Supplement: s1 [file s1]

**Supplementary material. Table S1.** Number of observation (Obs), individual captured (C) and recaptured (R) (adults and immatures) each year in Port-Cros and Porquerolles islands according to snake species.

|                            |              | Montpellier Snake |            |           | Ladder Snake |           |           |
|----------------------------|--------------|-------------------|------------|-----------|--------------|-----------|-----------|
|                            |              | Obs               | C          | R         | Obs          | C         | R         |
| <b>Port-Cros island</b>    | 2012         | 22                | 11         | 0         | 1            | 1         | 0         |
|                            | 2013         | 81                | 39         | 13        | 21           | 17        | 1         |
|                            | 2014         | 77                | 26         | 11        | 12           | 11        | 1         |
|                            | 2015         | 86                | 16         | 13        | 31           | 22        | 8         |
|                            | 2016         | 38                | 20         | 5         | 29           | 16        | 13        |
|                            | 2017         | 28                | 12         | 5         | 13           | 6         | 7         |
|                            | 2018         | 26                | 9          | 5         | 25           | 7         | 15        |
|                            | 2019         | 38                | 11         | 4         | 11           | 7         | 5         |
|                            | <b>Total</b> | <b>396</b>        | <b>144</b> | <b>57</b> | <b>143</b>   | <b>87</b> | <b>50</b> |
| <b>Porquerolles island</b> | 2012         | 16                | 10         | 0         | 0            | 0         | 0         |
|                            | 2013         | 31                | 13         | 7         | 17           | 11        | 6         |
|                            | 2014         | 42                | 23         | 12        | 11           | 8         | 3         |
|                            | 2015         | 37                | 11         | 11        | 21           | 8         | 12        |
|                            | 2016         | 23                | 14         | 8         | 14           | 2         | 12        |
|                            | 2017         | 32                | 13         | 13        | 11           | 4         | 6         |
|                            | 2018         | 32                | 12         | 9         | 24           | 6         | 17        |
|                            | 2019         | 22                | 16         | 3         | 20           | 2         | 20        |
|                            | <b>Total</b> | <b>235</b>        | <b>112</b> | <b>63</b> | <b>118</b>   | <b>41</b> | <b>76</b> |
